# Supplementary material for: IgA Nephropathy Patient Baseline Characteristics in the Sparsentan PROTECT Study
Source: PubMed Central journal article supplement (PMC10166729; doi:10.1016/j.ekir.2023.02.1086), 2023-03-04
Supplement: mmc1.pdf [file mmc1.pdf]

## Supplemental Tables and Figure

**Figure S1.** Patients receiving ACEi and ARB at screening at <50%, 50% to 80%, and >80% of MLD for patients on ACEi only, patients on ARB only, and patients on ACEi and ARB by (a) Asian geographic regions and (b) Non-Asian Geographic Regions

**a.**

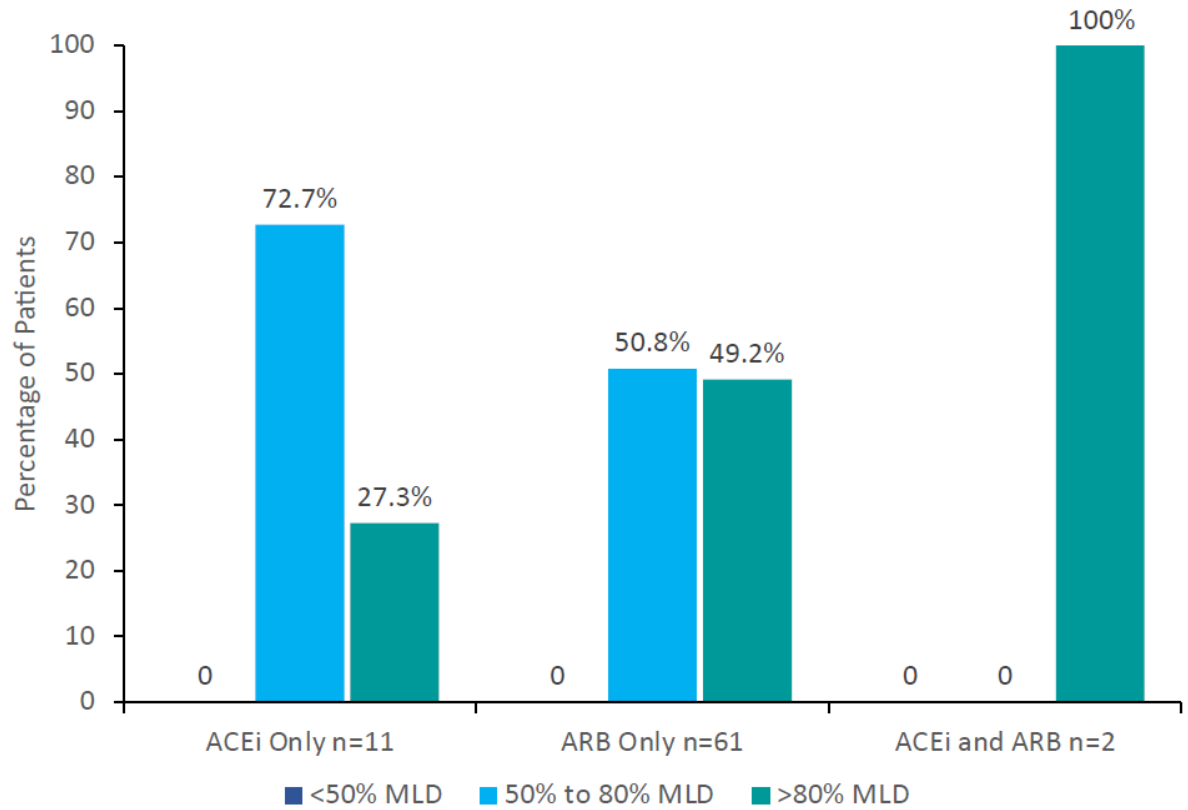

**b.**

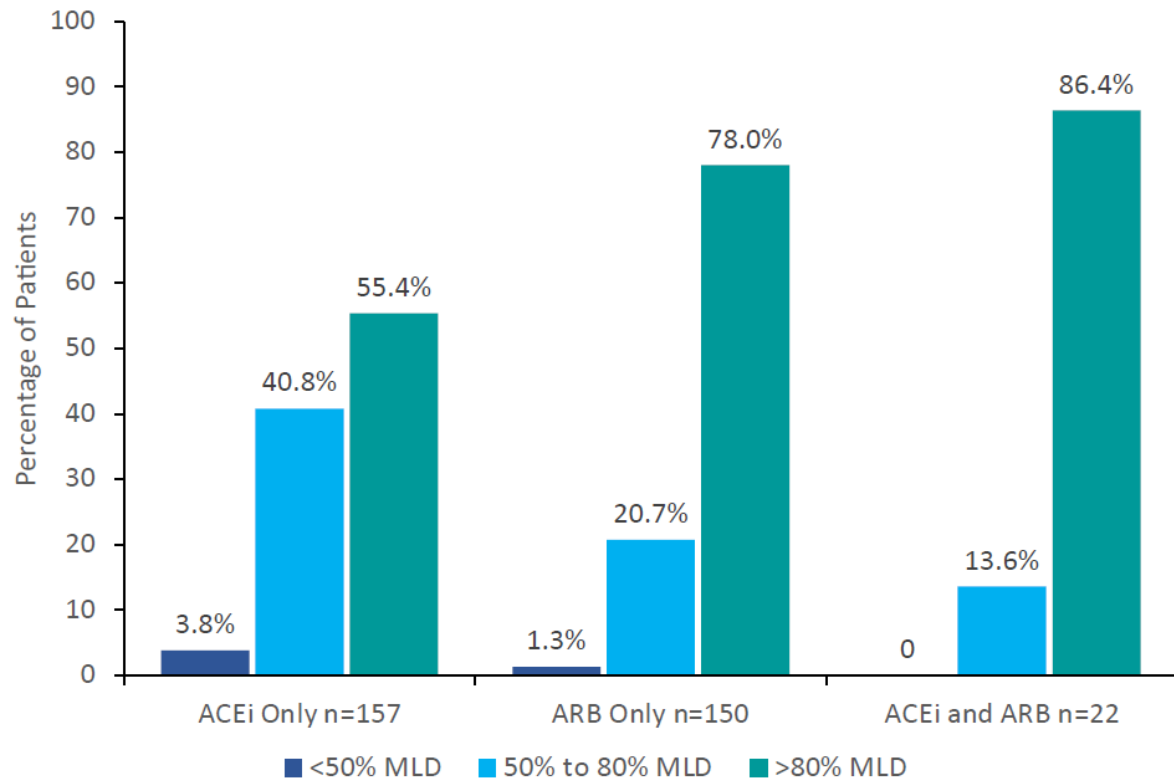

For patients with more than 1 record of MLD percentage and for patients taking both ACEi and ARB treatment, the highest percentage MLD was included.

Asian geographic regions include Hong Kong, Taiwan, and South Korea. Non-Asian geographic regions include all other countries.

ACEi, angiotensin converting enzyme inhibitor; ARB, angiotensin receptor blocker; MLD, maximum labeled dose.

**Table S1.** Baseline demographic characteristics and relevant medical history of patients who were randomized and received study drug in PROTECT by Asian and non-Asian geographic regions

| <b>Characteristic</b>                                                   | <b>Asian geographic regions<br/>(n=74)</b> | <b>Non-Asian geographic regions<br/>(n=330)</b> |
|-------------------------------------------------------------------------|--------------------------------------------|-------------------------------------------------|
| Age at informed consent, years                                          | 48.5 (40.0-56.0)                           | 46.0 (36.0-56.0)                                |
| Sex                                                                     |                                            |                                                 |
| Male                                                                    | 43 (58.1)                                  | 239 (72.4)                                      |
| Female                                                                  | 31 (41.9)                                  | 91 (27.6)                                       |
| Race <sup>a</sup>                                                       |                                            |                                                 |
| White                                                                   | 0                                          | 272 (82.4)                                      |
| Asian                                                                   | 74 (100)                                   | 41 (12.4)                                       |
| Black or African American                                               | 0                                          | 4 (1.2)                                         |
| Other                                                                   | 0                                          | 13 (3.9)                                        |
| Ethnicity                                                               |                                            |                                                 |
| Not Hispanic or Latino                                                  | 74 (100)                                   | 294 (89.1)                                      |
| Hispanic or Latino                                                      | 0                                          | 33 (10.0)                                       |
| Not reported                                                            | 0                                          | 3 (0.9)                                         |
| Age at IgAN diagnosis, years <sup>b</sup>                               | 41.5 (33.0-51.0)                           | 37.5 (29.0-49.0)                                |
| Time from initial kidney biopsy to informed consent, years <sup>c</sup> | 3.0 (1.0-9.0)                              | 4.0 (1.0-10.0)                                  |
| History of diabetes and impaired fasting glucose                        | 8 (10.8)                                   | 35 (10.6)                                       |
| History of hypertension                                                 | 43 (58.1)                                  | 266 (80.6)                                      |
| Blood pressure, mmHg                                                    |                                            |                                                 |
| Systolic                                                                | 124.1 ± 14.5                               | 130.1 ± 13.0                                    |
| Diastolic                                                               | 80.1 ± 10.9                                | 83.0 ± 10.5                                     |
| BMI, kg/m <sup>2</sup>                                                  | 26.6 ± 4.6                                 | 28.9 ± 5.5                                      |

Data are given as n (%), median (IQR), or mean ± SD. Asian geographic regions include Hong Kong, Taiwan, and South Korea. Non-Asian geographic regions include all other countries.

BMI, body mass index; IgAN, immunoglobulin A nephropathy; IQR, interquartile range.

<sup>a</sup>Patients may have selected more than 1 race. “Other” race included American Indian or Alaskan Native, Native Hawaiian or Other Pacific Islander, and Other.

<sup>b</sup>Age at IgAN diagnosis is derived based on the year of IgAN diagnosis and year of birth.

<sup>c</sup>Time from initial biopsy is derived based on the year of the initial kidney biopsy and year of signed informed consent.

**Table S2.** Laboratory values at baseline in patients who were randomized and received study drug in PROTECT by Asian and non-Asian geographic regions

| <b>Characteristic</b>                        | <b>Asian geographic regions<br/>(n=74)</b> | <b>Non-Asian geographic regions<br/>(n=330)</b> |
|----------------------------------------------|--------------------------------------------|-------------------------------------------------|
| UP/C, g/g                                    | 1.4 (0.9-1.9)                              | 1.2 (0.8-1.8)                                   |
| Urinary protein excretion, g/day             | 1.7 (1.2-2.5)                              | 1.8 (1.3-2.8)                                   |
| Nephrotic range proteinuria (>3.5 g/day)     | 8 (10.8)                                   | 41 (12.4)                                       |
| UA/C, g/g                                    | 1.2 (0.8-1.6)                              | 1.0 (0.7-1.5)                                   |
| Urinary albumin excretion, mg/day            | 1465 (1087-2195)                           | 1499 (1057-2288)                                |
| eGFR <sup>a</sup>                            |                                            |                                                 |
| Mean ± SD                                    | 59.3 ± 23.7                                | 56.4 ± 24.0                                     |
| Median (IQR)                                 | 51.5 (41.0-73.0)                           | 50.0 (38.0-70.0)                                |
| eGFR                                         |                                            |                                                 |
| ≥90                                          | 12 (16.2)                                  | 39 (11.8)                                       |
| ≥60 to <90                                   | 16 (21.6)                                  | 81 (24.5)                                       |
| ≥45 to <60                                   | 19 (25.7)                                  | 75 (22.7)                                       |
| ≥30 to <45                                   | 25 (33.8)                                  | 117 (35.5)                                      |
| ≥15 to <30                                   | 2 (2.7)                                    | 18 (5.5)                                        |
| Hemoglobin, g/L                              | 133.6 ± 15.1                               | 139.9 ± 15.9                                    |
| Plasma lipid profile, mmol/L                 |                                            |                                                 |
| Total cholesterol                            | 4.6 ± 1.0                                  | 5.0 ± 1.1                                       |
| HDL cholesterol                              | 1.3 ± 0.4                                  | 1.3 ± 0.4                                       |
| LDL cholesterol                              | 2.4 ± 0.8                                  | 2.9 ± 1.0                                       |
| Triglycerides                                | 1.9 ± 1.0                                  | 1.9 ± 1.1                                       |
| Serum albumin, g/L                           |                                            |                                                 |
| Mean ± SD                                    | 40.6 ± 5.1                                 | 41.6 ± 3.5                                      |
| Median (IQR)                                 | 41.5 (38.0-44.0)                           | 42.0 (40.0-44.0)                                |
| Serum potassium, mmol/L                      | 4.7 ± 0.4                                  | 4.6 ± 0.4                                       |
| Serum creatinine, μmol/L                     | 125.8 ± 42.1                               | 138.4 ± 45.7                                    |
| Serum cystatin C, mg/L                       | 1.4 ± 0.4                                  | 1.5 ± 0.4                                       |
| Hematuria/microscopic hematuria <sup>b</sup> | 38 (51.4)                                  | 187 (56.7)                                      |
| Urine creatinine, mg/dL                      | 73.2 ± 30.9                                | 74.8 ± 30.8                                     |
| Urine sodium, mEq/L                          | 78.6 ± 27.8                                | 80.4 ± 32.7                                     |
| ALT, U/L                                     | 22.5 ± 13.5                                | 21.6 ± 10.2                                     |
| AST, U/L                                     | 21.4 ± 8.8                                 | 21.1 ± 7.8                                      |

Data are given as n (%), median (IQR), or mean ± SD. Asian geographic regions include Hong Kong, Taiwan, and South Korea. Non-Asian geographic regions include all other countries.

ALT, alanine transaminase; AST, aspartate transferase; eGFR, estimated glomerular filtration rate in ml/min/1.73 m<sup>2</sup>; HDL, high-density lipoprotein; IQR, interquartile range; LDL, low-density lipoprotein; SD, standard deviation; UA/C, urine albumin/creatinine ratio; UP/C, urine protein/creatinine ratio.

A central laboratory was used for all laboratory testing analyses.

<sup>a</sup>eGFR was determined using the Chronic Kidney Disease Epidemiology (CKD-EPI) formula.

<sup>b</sup>The assessment of macroscopic hematuria was not possible due to the use of a central laboratory, resulting in an unreliable analysis of macrohematuria due to the transport time and analysis delays.

**Table S3.** Medications at screening and baseline for patients who were randomized and received study drug in PROTECT by Asian and non-Asian geographic regions

| Characteristic                                                                   | Asian geographic regions<br>(n=74) | Non-Asian geographic regions<br>(n=330) |
|----------------------------------------------------------------------------------|------------------------------------|-----------------------------------------|
| ACEi and ARB treatment at screening <sup>a</sup>                                 |                                    |                                         |
| ACEi only, n (% on MLD)                                                          | 11 (14.9, 27.3)                    | 157 (47.6, 54.1)                        |
| ARB only, n (% on MLD)                                                           | 61 (82.4, 49.2)                    | 150 (45.5, 78.0)                        |
| ACEi and ARB, n (% on MLD of both, % on MLD of either)                           | 2 (2.7, 100, 100)                  | 22 (6.7, 31.8, 86.4)                    |
| MLD of ACEi or ARB, n (%)                                                        | 35 (47.3)                          | 221 (67.0)                              |
| Baseline medication use, n (%) <sup>b</sup>                                      |                                    |                                         |
| Antihypertensive medications <sup>c</sup>                                        | 27 (36.5)                          | 147 (44.6)                              |
| Diuretics                                                                        | 5 (6.8)                            | 57 (17.3)                               |
| Beta-blockers                                                                    | 9 (12.2)                           | 46 (13.9)                               |
| Alpha-blockers                                                                   | 5 (6.8)                            | 17 (5.2)                                |
| Calcium channel blockers                                                         | 20 (27.0)                          | 89 (27.0)                               |
| Other                                                                            | 1 (1.4)                            | 22 (6.7)                                |
| ≥2 antihypertensive medications at baseline (excluding RAASi medications)        | 8 (10.8)                           | 53 (16.1)                               |
| Number of antihypertensive medications per patient (including RAASi medications) |                                    |                                         |
| Mean ± SD                                                                        | 1.4 ± 0.7                          | 1.6 ± 0.9                               |
| Median (IQR)                                                                     | 1.0 (1-2)                          | 1.0 (1-2)                               |
| Lipid-lowering medications                                                       | 50 (67.6)                          | 173 (52.4)                              |

Asian geographic regions include Hong Kong, Taiwan, and South Korea. Non-Asian geographic regions include all other countries.

ACEi, angiotensin converting enzyme inhibitor; ARB, angiotensin receptor blocker; IQR, interquartile range; MLD, maximum labeled dose; RAASi, renin-angiotensin-aldosterone system inhibitors; SD, standard deviation.

<sup>a</sup>ACEi and ARB treatment at screening; RAASi were prohibited during the study. Each “% on MLD” is based on the related n-value of patients receiving ACEi only, ARB only, or ACEi and ARB.

<sup>b</sup>Baseline medications were started prior to randomization (Day 1) and continued after the initial dose of study medication.

<sup>c</sup>Antihypertensive medications exclude ACEis, ARBs, aldosterone blockers, and aliskiren.

**Table S4.** Baseline demographic characteristics and relevant medical history of patients who were randomized and received study drug in PROTECT by Asian and non-Asian race within geographic regions

| Characteristic                                                          | Asian geographic regions |                   | Non-Asian geographic regions |                        |
|-------------------------------------------------------------------------|--------------------------|-------------------|------------------------------|------------------------|
|                                                                         | Asian race (n=74)        | Asian race (n=42) | Asian race (n=42)            | Non-Asian race (n=288) |
| Age at informed consent, years                                          | 48.5 (40.0-56.0)         | 45.5 (38.0-57.0)  | 45.5 (38.0-57.0)             | 46.0 (36.0-56.0)       |
| Sex                                                                     |                          |                   |                              |                        |
| Male                                                                    | 43 (58.1)                | 20 (47.6)         | 20 (47.6)                    | 219 (76.0)             |
| Female                                                                  | 31 (41.9)                | 22 (52.4)         | 22 (52.4)                    | 69 (24.0)              |
| Race <sup>a</sup>                                                       |                          |                   |                              |                        |
| White                                                                   | 0                        | 0                 | 0                            | 272 (94.4)             |
| Asian                                                                   | 74 (100)                 | 41 (97.6)         | 41 (97.6)                    | 0                      |
| Black or African American                                               | 0                        | 0                 | 0                            | 4 (1.4)                |
| Other                                                                   | 0                        | 1 (2.4)           | 1 (2.4)                      | 12 (4.2)               |
| Ethnicity                                                               |                          |                   |                              |                        |
| Not Hispanic or Latino                                                  | 74 (100)                 | 42 (100)          | 42 (100)                     | 252 (87.5)             |
| Hispanic or Latino                                                      | 0                        | 0                 | 0                            | 33 (11.5)              |
| Not reported                                                            | 0                        | 0                 | 0                            | 3 (1.0)                |
| Age at IgAN diagnosis, years <sup>b</sup>                               | 41.5 (33.0-51.0)         | 37.0 (31.0-46.0)  | 37.0 (31.0-46.0)             | 38.0 (29.0-49.0)       |
| Time from initial kidney biopsy to informed consent, years <sup>c</sup> | 3.0 (1.0-9.0)            | 4.5 (2.0-9.0)     | 4.5 (2.0-9.0)                | 4.0 (1.0-10.0)         |
| History of diabetes or impaired fasting glucose                         | 8 (10.8)                 | 6 (14.3)          | 6 (14.3)                     | 29 (10.1)              |
| History of hypertension                                                 | 43 (58.1)                | 26 (61.9)         | 26 (61.9)                    | 240 (83.3)             |
| Blood pressure, mmHg                                                    |                          |                   |                              |                        |
| Systolic                                                                | 124.1 ± 14.6             | 124.5 ± 9.9       | 124.5 ± 9.9                  | 130.9 ± 13.2           |
| Diastolic                                                               | 80.1 ± 10.9              | 81.1 ± 9.0        | 81.1 ± 9.0                   | 83.2 ± 10.7            |
| BMI, kg/m <sup>2</sup>                                                  | 26.6 ± 4.6               | 27.9 ± 5.0        | 27.9 ± 5.0                   | 29.0 ± 5.6             |

Data are given as n (%), median (IQR), or mean ± SD. Asian geographic regions include Hong Kong, Taiwan, and South Korea. Non-Asian geographic regions include all other countries. For patients who selected multiple races, if one of the races was Asian, the patient was included as Asian.

BMI, body mass index; IgAN, immunoglobulin A nephropathy; IQR, interquartile range.

<sup>a</sup>Patients may have selected more than 1 race. “Other” race included American Indian or Alaskan Native, Native Hawaiian or Other Pacific Islander, and Other.

<sup>b</sup>Age at IgAN diagnosis is derived based on the year of IgAN diagnosis and year of birth.

<sup>c</sup>Time from initial biopsy is derived based on the year of the initial kidney biopsy and year of signed informed consent.

**Table S5.** Laboratory values at baseline in patients who were randomized and received study drug in PROTECT by Asian and non-Asian race within geographic regions

| Characteristic                               | Asian geographic regions |                   | Non-Asian geographic regions |  |
|----------------------------------------------|--------------------------|-------------------|------------------------------|--|
|                                              | Asian race (n=74)        | Asian race (n=42) | Non-Asian race (n=288)       |  |
| UP/C, g/g                                    | 1.4 (0.9-1.9)            | 1.3 (0.9-2.1)     | 1.2 (0.8-1.8)                |  |
| Urinary protein excretion, g/day             | 1.7 (1.2-2.5)            | 1.7 (1.2-2.4)     | 1.8 (1.3-2.9)                |  |
| Nephrotic range proteinuria (>3.5 g/day)     | 8 (10.8)                 | 4 (9.5)           | 37 (12.8)                    |  |
| UA/C, g/g                                    | 1.2 (0.8-1.6)            | 1.0 (0.7-1.7)     | 1.0 (0.7-1.4)                |  |
| Urinary albumin excretion, mg/day            | 1465 (1087-2195)         | 1485 (1034-1834)  | 1508 (1059-2376)             |  |
| eGFR <sup>a</sup>                            |                          |                   |                              |  |
| Mean ± SD                                    | 59.3 ± 23.7              | 57.5 ± 23.9       | 56.3 ± 24.1                  |  |
| Median (IQR)                                 | 51.5 (41.0-73.0)         | 50.5 (38.0-72.0)  | 50.0 (38.0-70.0)             |  |
| eGFR                                         |                          |                   |                              |  |
| ≥90                                          | 12 (16.2)                | 6 (14.3)          | 33 (11.5)                    |  |
| ≥60 to <90                                   | 16 (21.6)                | 11 (26.2)         | 70 (24.3)                    |  |
| ≥45 to <60                                   | 19 (25.7)                | 8 (19.0)          | 67 (23.3)                    |  |
| ≥30 to <45                                   | 25 (33.8)                | 15 (35.7)         | 102 (35.4)                   |  |
| ≥15 to <30                                   | 2 (2.7)                  | 2 (4.8)           | 16 (5.6)                     |  |
| Hemoglobin, g/L                              | 133.6 ± 15.1             | 134.3 ± 14.4      | 140.7 ± 16.0                 |  |
| Plasma lipid profile, mmol/L                 |                          |                   |                              |  |
| Total cholesterol                            | 4.6 ± 1.0                | 5.1 ± 1.2         | 5.0 ± 1.1                    |  |
| HDL cholesterol                              | 1.3 ± 0.4                | 1.3 ± 0.4         | 1.3 ± 0.4                    |  |
| LDL cholesterol                              | 2.4 ± 0.8                | 3.0 ± 1.0         | 2.9 ± 1.1                    |  |
| Triglycerides                                | 1.9 ± 1.0                | 2.1 ± 1.1         | 1.9 ± 1.1                    |  |
| Serum albumin, g/L                           |                          |                   |                              |  |
| Mean ± SD                                    | 40.6 ± 5.1               | 41.0 ± 4.3        | 41.7 ± 3.4                   |  |
| Median (IQR)                                 | 41.5 (38.0-44.0)         | 42.0 (40.0-44.0)  | 42.0 (40.0-44.0)             |  |
| Serum potassium, mmol/L                      | 4.7 ± 0.4                | 4.4 ± 0.5         | 4.7 ± 0.4                    |  |
| Serum creatinine, μmol/L                     | 125.8 ± 42.1             | 128.0 ± 44.8      | 139.9 ± 45.7                 |  |
| Serum cystatin C, mg/L                       | 1.4 ± 0.4                | 1.5 ± 0.4         | 1.5 ± 0.4                    |  |
| Hematuria/microscopic hematuria <sup>b</sup> | 38 (51.4)                | 19 (45.2)         | 168 (58.3)                   |  |
| Urine sodium, mEq/L                          | 78.6 ± 27.8              | 69.1 ± 25.3       | 82.0 ± 33.3                  |  |

eGFR, estimated glomerular filtration rate in ml/min/1.73m<sup>2</sup>; HDL, high-density lipoprotein; IQR, interquartile range; LDL, low-density lipoprotein; SD, standard deviation; UA/C, urine albumin/creatinine ratio; UP/C, urine protein/creatinine ratio.

Data are given as n (%), median (IQR), or mean ± SD. A central laboratory was used for all laboratory testing analyses.

<sup>a</sup>eGFR was determined using the Chronic Kidney Disease Epidemiology (CKD-EPI) formula.

<sup>b</sup>The assessment of macroscopic hematuria was not possible due to the use of a central laboratory, resulting in an unreliable analysis of macrohematuria due to the transport time and analysis delays.

**Table S6.** Medications at screening and baseline for patients who were randomized and received study drug in PROTECT by Asian and non-Asian race within geographic regions

| Characteristic                                                                   | Asian geographic regions | Non-Asian geographic regions |                        |
|----------------------------------------------------------------------------------|--------------------------|------------------------------|------------------------|
|                                                                                  | Asian race (n=74)        | Asian race (n=42)            | Non-Asian race (n=288) |
| ACEi and ARB treatment at screening, n (%) <sup>a</sup>                          |                          |                              |                        |
| ACEi only, n (% , % on MLD)                                                      | 11 (14.9, 27.3)          | 17 (40.5, 41.2)              | 140 (48.6, 55.7)       |
| ARB only, n (% , % on MLD)                                                       | 61 (82.4, 49.2)          | 23 (54.8, 87.0)              | 127 (44.1, 76.4)       |
| ACEi and ARB, n (% , % on MLD of both, % on MLD of either)                       | 2 (2.7, 100, 100)        | 2 (4.8, 0, 100)              | 20 (6.9, 35.0, 85.0)   |
| MLD of ACEi or ARB, n (%)                                                        | 35 (47.3)                | 29 (69.0)                    | 192 (66.7)             |
| Baseline medication use, n (%) <sup>b</sup>                                      |                          |                              |                        |
| Antihypertensive medications <sup>c</sup>                                        | 27 (36.5)                | 14 (33.3)                    | 133 (46.2)             |
| Diuretics                                                                        | 5 (6.8)                  | 5 (11.9)                     | 52 (18.1)              |
| Beta-blockers                                                                    | 9 (12.2)                 | 5 (11.9)                     | 41 (14.2)              |
| Alpha-blockers                                                                   | 5 (6.8)                  | 0                            | 17 (5.9)               |
| Calcium channel blockers                                                         | 20 (27.0)                | 10 (23.8)                    | 79 (27.4)              |
| Other                                                                            | 1 (1.4)                  | 1 (2.4)                      | 21 (7.3)               |
| ≥2 antihypertensive medications at baseline (excluding RAASi medications)        | 8 (10.8)                 | 5 (11.9)                     | 48 (16.7)              |
| Number of antihypertensive medications per patient (including RAASi medications) |                          |                              |                        |
| Mean ± SD                                                                        | 1.4 ± 0.7                | 1.6 ± 0.9                    | 1.6 ± 0.9              |
| Median (IQR)                                                                     | 1.0 (1-2)                | 1.0 (1-2)                    | 1.0 (1-2)              |
| Lipid-lowering medications                                                       | 50 (67.6)                | 24 (57.1)                    | 149 (51.7)             |

Data are given as n (%), median (IQR), or mean ± SD. Asian geographic regions include Hong Kong, Taiwan, and South Korea. Non-Asian geographic regions include all other countries. For patients who selected multiple races, if one of the races was Asian, the patient was included as Asian.

ACEi, angiotensin converting enzyme inhibitor; ARB, angiotensin receptor blocker; IQR, interquartile range; MLD, maximum labeled dose; RAASi, renin-angiotensin-aldosterone system inhibitors; SD, standard deviation.

<sup>a</sup>ACEi and ARB treatment at screening; RAASi were prohibited during the study. Each “% on MLD” is based on the related n-value of patients receiving ACEi only, ARB only, or ACEi and ARB.

<sup>b</sup>Baseline medications were started prior to randomization (Day 1) and continued after the initial dose of study medication.

<sup>c</sup>Antihypertensive medications exclude ACEis, ARBs, aldosterone blockers, and aliskiren.



**Table S7.** The minimum daily doses for the most common ACEis and ARBs for study eligibility screening

| <b>ACEi</b>  | <b>Minimum daily dose at screening</b> | <b>ARB</b>  | <b>Minimum daily dose at screening</b> |
|--------------|----------------------------------------|-------------|----------------------------------------|
| Benazepril   | 20 mg                                  | Candesartan | 16 mg                                  |
| Captopril    | 75 mg                                  | Eprosartan  | 300 mg                                 |
| Enalapril    | 20 mg                                  | Irbesartan  | 150 mg                                 |
| Fosinopril   | 20 mg                                  | Losartan    | 50 mg                                  |
| Moexipril    | 15 mg                                  | Valsartan   | 160 mg                                 |
| Perindopril  | 4 mg                                   | Telmisartan | 40 mg                                  |
| Quinapril    | 20 mg                                  | Olmesartan  | 20 mg                                  |
| Ramipril     | 5 mg                                   | Azilsartan  | 40 mg                                  |
| Trandolapril | 2 mg                                   |             |                                        |
| Lisinopril   | 20 mg                                  |             |                                        |
| Zofenopril   | 30 mg                                  |             |                                        |
| Cilazapril   | 5 mg                                   |             |                                        |
| Delapril     | 60 mg                                  |             |                                        |
| Imidapril    | 10 mg                                  |             |                                        |

ACEi, angiotensin converting enzyme inhibitor; ARB, angiotensin receptor blocker; MLD, maximum labeled dose.

Values in the table represent 50% of the MLD of the drugs in most participating countries. The values are considered approximately equivalent to the minimum daily dose of the active comparator for the treatment phase of PROTECT (ie, irbesartan 150 mg/day). If a patient is on a combination of an ACEi and an ARB, the sum of the individual doses (as a percentage of the MLD on the table) should be at least 50% (eg, 2.5 mg/day ramipril [25%] + 25 mg losartan [25%] = 50% in total).

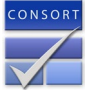

# CONSORT 2010 checklist of information to include when reporting a randomised trial\*

| Section/Topic             | Item No | Checklist item                                                                                                                        | Reported on page No                                                                                                           |
|---------------------------|---------|---------------------------------------------------------------------------------------------------------------------------------------|-------------------------------------------------------------------------------------------------------------------------------|
| <b>Title and abstract</b> |         |                                                                                                                                       |                                                                                                                               |
|                           | 1a      | Identification as a randomised trial in the title                                                                                     | Not in title as this is an aggregated baseline characteristics paper and word limit prevented full trial description in title |
|                           | 1b      | Structured summary of trial design, methods, results, and conclusions (for specific guidance see CONSORT for abstracts)               | 3                                                                                                                             |
| <b>Introduction</b>       |         |                                                                                                                                       |                                                                                                                               |
| Background and objectives | 2a      | Scientific background and explanation of rationale                                                                                    | 4-5                                                                                                                           |
|                           | 2b      | Specific objectives or hypotheses                                                                                                     | 5                                                                                                                             |
| <b>Methods</b>            |         |                                                                                                                                       |                                                                                                                               |
| Trial design              | 3a      | Description of trial design (such as parallel, factorial) including allocation ratio                                                  | 5                                                                                                                             |
|                           | 3b      | Important changes to methods after trial commencement (such as eligibility criteria), with reasons                                    | NA                                                                                                                            |
| Participants              | 4a      | Eligibility criteria for participants                                                                                                 | 5-6                                                                                                                           |
|                           | 4b      | Settings and locations where the data were collected                                                                                  | 5/8                                                                                                                           |
| Interventions             | 5       | The interventions for each group with sufficient details to allow replication, including how and when they were actually administered | NA (baseline focus)                                                                                                           |
| Outcomes                  | 6a      | Completely defined pre-specified primary and secondary outcome measures, including how and when they were assessed                    | 7                                                                                                                             |
|                           | 6b      | Any changes to trial outcomes after the trial commenced, with reasons                                                                 | NA (baseline focus)                                                                                                           |
| Sample size               | 7a      | How sample size was determined                                                                                                        | 5                                                                                                                             |

|                                                      |     |                                                                                                                                                                                             |                        |
|------------------------------------------------------|-----|---------------------------------------------------------------------------------------------------------------------------------------------------------------------------------------------|------------------------|
|                                                      | 7b  | When applicable, explanation of any interim analyses and stopping guidelines                                                                                                                | 7                      |
| Randomisation:                                       |     |                                                                                                                                                                                             |                        |
| Sequence generation                                  | 8a  | Method used to generate the random allocation sequence                                                                                                                                      | 5                      |
| Allocation concealment mechanism                     | 8b  | Type of randomisation; details of any restriction (such as blocking and block size)                                                                                                         | 5                      |
|                                                      | 9   | Mechanism used to implement the random allocation sequence (such as sequentially numbered containers), describing any steps taken to conceal the sequence until interventions were assigned | 5                      |
| Implementation                                       | 10  | Who generated the random allocation sequence, who enrolled participants, and who assigned participants to interventions                                                                     | 5                      |
| Blinding                                             | 11a | If done, who was blinded after assignment to interventions (for example, participants, care providers, those assessing outcomes) and how                                                    | 5                      |
|                                                      | 11b | If relevant, description of the similarity of interventions                                                                                                                                 | 5                      |
| Statistical methods                                  | 12a | Statistical methods used to compare groups for primary and secondary outcomes                                                                                                               | NA (baseline focus)    |
|                                                      | 12b | Methods for additional analyses, such as subgroup analyses and adjusted analyses                                                                                                            | NA (baseline focus)    |
| <b>Results</b>                                       |     |                                                                                                                                                                                             |                        |
| Participant flow (a diagram is strongly recommended) | 13a | For each group, the numbers of participants who were randomly assigned, received intended treatment, and were analysed for the primary outcome                                              | 8                      |
|                                                      | 13b | For each group, losses and exclusions after randomisation, together with reasons                                                                                                            | 8                      |
| Recruitment                                          | 14a | Dates defining the periods of recruitment and follow-up                                                                                                                                     | NA (trial in progress) |
|                                                      | 14b | Why the trial ended or was stopped                                                                                                                                                          | NA (trial in progress) |
| Baseline data                                        | 15  | A table showing baseline demographic and clinical characteristics for each group                                                                                                            | 23-28                  |
| Numbers analysed                                     | 16  | For each group, number of participants (denominator) included in each analysis and whether the analysis was by original assigned groups                                                     | NA (baseline focus)    |
| Outcomes and estimation                              | 17a | For each primary and secondary outcome, results for each group, and the estimated effect size and its precision (such as 95% confidence interval)                                           | NA (baseline focus)    |
|                                                      | 17b | For binary outcomes, presentation of both absolute and relative effect sizes is recommended                                                                                                 | NA (baseline focus)    |
| Ancillary analyses                                   | 18  | Results of any other analyses performed, including subgroup analyses and adjusted analyses, distinguishing pre-specified from exploratory                                                   | 10 and Supplemental    |

|                          |    |                                                                                                                  |                               |
|--------------------------|----|------------------------------------------------------------------------------------------------------------------|-------------------------------|
| Harms                    | 19 | All important harms or unintended effects in each group (for specific guidance see CONSORT for harms)            | tables<br>NA (baseline focus) |
| <b>Discussion</b>        |    |                                                                                                                  |                               |
| Limitations              | 20 | Trial limitations, addressing sources of potential bias, imprecision, and, if relevant, multiplicity of analyses | 15 (baseline focus)           |
| Generalisability         | 21 | Generalisability (external validity, applicability) of the trial findings                                        | 14-16<br>(baseline focus)     |
| Interpretation           | 22 | Interpretation consistent with results, balancing benefits and harms, and considering other relevant evidence    | 12-16                         |
| <b>Other information</b> |    |                                                                                                                  |                               |
| Registration             | 23 | Registration number and name of trial registry                                                                   | 16                            |
| Protocol                 | 24 | Where the full trial protocol can be accessed, if available                                                      | NA (trial ongoing)            |
| Funding                  | 25 | Sources of funding and other support (such as supply of drugs), role of funders                                  | 16                            |

\*We strongly recommend reading this statement in conjunction with the CONSORT 2010 Explanation and Elaboration for important clarifications on all the items. If relevant, we also recommend reading CONSORT extensions for cluster randomised trials, non-inferiority and equivalence trials, non-pharmacological treatments, herbal interventions, and pragmatic trials. Additional extensions are forthcoming: for those and for up to date references relevant to this checklist, see [www.consort-statement.org](http://www.consort-statement.org).
